# Supplementary material for: Plasmon-enhanced hydrogen evolution reaction on a Ag-branched-nanowire/Pt nanoparticle/AgCl nanocomposite
Source: Royal Society of Chemistry journal article supplement (doi:10.1039/d1cp00467k), 2021-01-01
Supplement: d1cp00467k1.pdf [file d1cp00467k1.pdf]

### Supplementary Information

#### **Plasmon-Enhanced Hydrogen Evolution Reaction on a Ag-Branched-Nanowire/Pt Nanoparticle/AgCl Nanocomposite**

Nigusie Amanu Lakachew<sup>a</sup>, Masaki Ujihara<sup>b</sup>

a) *Department of chemical engineering, National Taiwan University of Science and Technology, 43 Keelung Road, Taipei 10607, Taiwan, Republic of China*

b) *Graduate Institute of Applied Science and Technology, National Taiwan University of Science and Technology, 43 Keelung Road, Taipei 10607, Taiwan, Republic of China*

*Corresponding author: Masaki Ujihara, E-mail: masaki.ujihara@mail.ntust.edu.tw*

## 1. EDS analyses

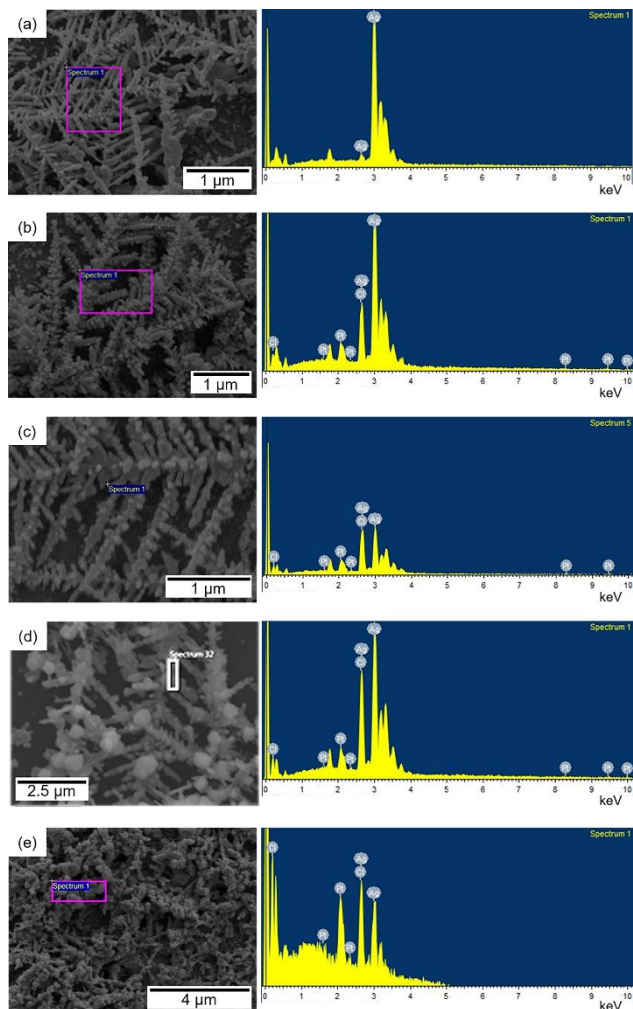

Figure S1. SEM images (left) and EDS (right) of (a) AgBNWs and (b-e) AgBNW/PtNP/AgCl nanocomposites prepared from solutions of (b) 1, (c) 2, (d) 3, and (e) 5 mM, respectively.

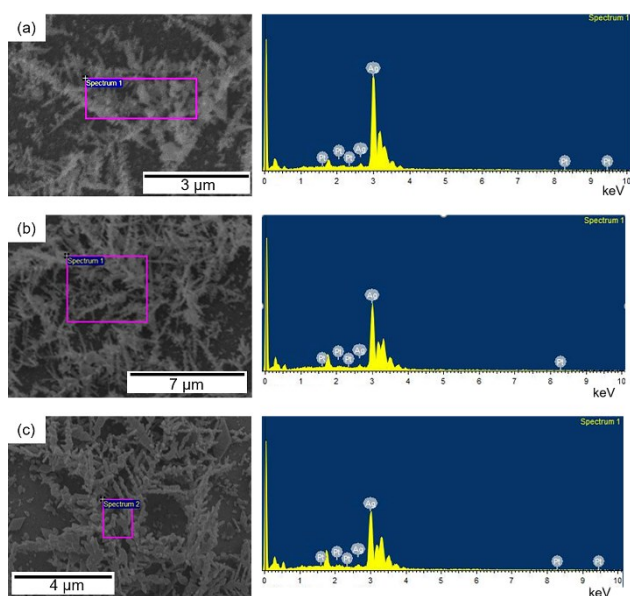

Figure S2. SEM images (left) and EDS (right) of AgBNW/PtNP bimetal prepared from solutions of (a) 1, (b) 2, and (c) 3 mM, respectively.

Table S1. EDS elemental analysis for AgBNW/Pt/AgCl and AgBNW/PtNP nanocomposites prepared at different concentration of Pt precursor

| Electrodes           | Atomic weight (%) |       |       |
|----------------------|-------------------|-------|-------|
|                      | Ag                | Pt    | Cl    |
| AgBNW/Pt/AgCl (1 mM) | 68.46             | 4.17  | 27.38 |
| AgBNW/Pt/AgCl (2 mM) | 61.23             | 4.81  | 33.95 |
| AgBNW/Pt/AgCl (3 mM) | 61.23             | 4.24  | 34.63 |
| AgBNW/Pt/AgCl (5 mM) | 55.55             | 4.23  | 40.21 |
| AgBNW/Pt (1 mM)      | 88.70             | 11.30 | -     |
| AgBNW/Pt (2 mM)      | 87.71             | 12.29 | -     |
| AgBNW/Pt (3 mM)      | 86.79             | 13.21 | -     |

## 2. TEM observation

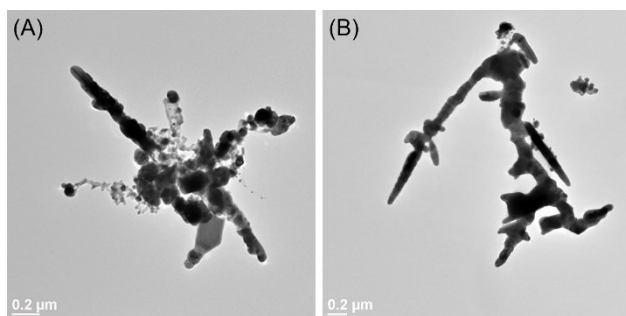

Figure S3. Low-resolution TEM images of AgBNW/PtNP/AgCl nanocomposite (A) and AgBNW/PtNP bimetal (B) prepared from the 2 mM Pt precursor solutions, respectively.
